# Supplementary material
Source: PubMed Central journal article supplement (PMC9299956)
Supplement: NIHMS1819003-supplement-Supplementary_Material.pdf [file NIHMS1819003-supplement-Supplementary_Material.pdf]

## **Supplementary Materials for:**

### **Assessment of technical heterogeneity among diagnostic tests to detect germline risk variants for hematopoietic malignancies**

#### **Contents:**

- S1. Table of inherited bone marrow failure syndrome assay characteristics
- S2. Table of ClinVar queries for relevant MDS/AL genes
- S3. Hereditary MDS/AL gene matrix
- S4. Inherited bone marrow failure syndromes gene matrix, part 1
- S5. Inherited bone marrow failure syndromes gene matrix, part 2
- S6. Inherited bone marrow failure syndromes gene matrix, part 3

## S1. Inherited Bone Marrow Failure Syndromes (IBMFS) Assay Characteristics

| Company / Institution | Preferred Specimen                    | # Genes Included | List Price (USD) | Turnaround (days) | CNV Resolution / Limitations                                         | CNV Confirmation | SNV Confirmation     |
|-----------------------|---------------------------------------|------------------|------------------|-------------------|----------------------------------------------------------------------|------------------|----------------------|
| Laboratory I          | WB <sup>a</sup>                       | 39               | 250 <sup>b</sup> | 10-21             | Single exon resolution                                               | MLPA             | Long-read sequencing |
| Laboratory J          | WB, purified DNA, saliva <sup>a</sup> | 135              | 1700             | 28                | May not reliably detect partial exon CNVs or indels > 50 bp          | ddPCR            | Upon Review          |
| Laboratory K          | SF                                    | 63               | 3000             | 42                | May not reliably detect partial-exon CNVs or rearrangements < 400 bp | MLPA, qPCR       | Sanger               |
| Laboratory L          | WB, SF, purified DNA                  | 86               | 3350             | 28-42             | Single exon resolution                                               | Upon Review      | Upon Review          |
| Laboratory M          | SF, WB, saliva <sup>a</sup>           | 116              | Not Disclosed    | 42                | Not Detected                                                         | Not Detected     | Sanger               |
| Laboratory N          | SF                                    | 133              | 1450             | 18                | ~80% sensitivity for CNVs < 4 exons                                  | aCGH, MLPA       | Upon Review          |
| Laboratory O          | WB                                    | 90               | 3090.70          | 42                | Reliably detects CNVs of 3+ exons                                    | MLPA/ddPCR       | Sanger               |
| Laboratory P          | WB, saliva, buccal <sup>a</sup>       | 60               | Not Disclosed    | 21-35             | Not Detected                                                         | MLPA, qPCR       | Sanger               |

Eight commercially available IBMFS assays were identified. Data were collected from laboratory websites, test requisition forms, and test information sheets. Laboratory representatives were contacted to verify the data. 7/8 laboratory representatives provided responses to our queries. Multiple tissue specimen types were accepted. Some laboratories (a) indicated the need for non-blood specimens in patients with active hematopoietic malignancies or who had received allogeneic transplants. Genes included reflect those on primary IBMFS panels for each laboratory and excluded “add-on” genes. Price reflects the list price before the application of health insurance cost reductions or maximum out-of-pocket (b) policies adopted by some entities. ‘Upon review’ indicates that variants are not reflexively validated but are instead confirmed by secondary methodology only if internal quality standards are not met. “Not Provided” indicates that no information was available on publicly available resources and no response to multiple email inquiries was received at the time of manuscript submission. ‘USD; US dollars, WB; whole blood, SF; skin fibroblasts, CNV; copy number variant, SNV; single nucleotide variant, indel; insertion/deletion, aCGH; array comparative genomic hybridization, MLPA; multiplex ligation-dependent probe amplification, qPCR; quantitative polymerase chain reaction, ddPCR; droplet digital polymerase chain reaction. Commercial IBMFS assays were offered by the following laboratories: Blueprint Genetics Bone Marrow Failure Syndrome Panel, University of Chicago Medical Center Inherited Bone Marrow Failure Panel, Cincinnati Children’s Hospital Bone Marrow Failure Gene Sequencing Panel, Fulgent Bone Marrow Failure NGS Panel, Invitae Bone Marrow Failure Syndromes

Panel, Children's Hospital of Philadelphia Bone Marrow Failure Panel, Prevention Genetics Inherited Bone Marrow Failure Panel, and University of Washington MarrowSeq Hereditary Bone Marrow Failure Panel, which are ordered randomly and anonymized above.

**S2.** ClinVar queries for genes included in 4/8 MDS/AL panels. Data collected Dec 2019.

| <b>Gene</b>    | <b>ClinVar listing?</b> | <b>Pathogenic/likely pathogenic germline/ de novo mutations (#)</b> | <b>ClinVar SNVs?</b> | <b>ClinVar CNVs?</b> |
|----------------|-------------------------|---------------------------------------------------------------------|----------------------|----------------------|
| <i>ANKRD26</i> | Yes                     | 6                                                                   | Yes                  | Yes                  |
| <i>ATM</i>     | Yes                     | 915                                                                 | Yes                  | Yes                  |
| <i>BLM</i>     | Yes                     | 70                                                                  | Yes                  | Yes                  |
| <i>BRCA2</i>   | Yes                     | 3398                                                                | Yes                  | Yes                  |
| <i>CBL</i>     | Yes                     | 24                                                                  | Yes                  | Yes                  |
| <i>CEBPA</i>   | Yes                     | 6                                                                   | No                   | Yes                  |
| <i>DDX41</i>   | Yes                     | 18                                                                  | Yes                  | Yes                  |
| <i>EPCAM</i>   | Yes                     | 56                                                                  | Yes                  | Yes                  |
| <i>ETV6</i>    | Yes                     | 17                                                                  | Yes                  | Yes                  |
| <i>GATA2</i>   | Yes                     | 50                                                                  | Yes                  | Yes                  |
| <i>MLH1</i>    | Yes                     | 878                                                                 | Yes                  | Yes                  |
| <i>MSH2</i>    | Yes                     | 962                                                                 | Yes                  | Yes                  |
| <i>MSH6</i>    | Yes                     | 703                                                                 | Yes                  | Yes                  |
| <i>NBN</i>     | Yes                     | 164                                                                 | Yes                  | Yes                  |
| <i>NF1</i>     | Yes                     | 1284                                                                | Yes                  | Yes                  |
| <i>PAX5</i>    | Yes                     | 10                                                                  | No                   | Yes                  |
| <i>PMS2</i>    | Yes                     | 344                                                                 | Yes                  | Yes                  |
| <i>PTPN11</i>  | Yes                     | 111                                                                 | Yes                  | No                   |
| <i>RUNX1</i>   | Yes                     | 47                                                                  | Yes                  | Yes                  |
| <i>SAMD9</i>   | Yes                     | 11                                                                  | Yes                  | No                   |
| <i>SAMD9L</i>  | Yes                     | 5                                                                   | Yes                  | No                   |
| <i>SRP72</i>   | Yes                     | 4                                                                   | Yes                  | Yes                  |
| <i>TERC</i>    | Yes                     | 19                                                                  | Yes                  | Yes                  |
| <i>TERT</i>    | Yes                     | 53                                                                  | Yes                  | Yes                  |
| <i>TP53</i>    | Yes                     | 414                                                                 | Yes                  | Yes                  |
